# Supplementary material
Source: PubMed Central journal article supplement (PMC2757794)
Supplement: NIHMS144056-supplement-02.pdf [file NIHMS144056-supplement-02.pdf]

Suppl. Table 1. Genes downregulated in miR-24 over-expressing cells

| Gene     | ACCESSION #    | Z-ratio | Ctl/miR-24 | p-value | miR-24 binding sites in 3'UTR (TargetScan 4.2) |              | CDS | Seed                   | Perfect Hexamer  | Perfect Heptamer | Perfect Octamer |
|----------|----------------|---------|------------|---------|------------------------------------------------|--------------|-----|------------------------|------------------|------------------|-----------------|
|          |                |         |            |         | Conserved                                      | Nonconserved |     |                        |                  |                  |                 |
| UBD      | NM_006398.2    | 6.1     | 0.00001    | 0       | 0                                              | 225.722      | No  | 2198, 2029, 2110, 2290 |                  |                  |                 |
| CNDP2    | NM_018235.1    | 5.24    | 0.0004     | 0       | 3                                              | 163..1590    | Yes |                        |                  |                  |                 |
| FLJ33814 | NM_173510.1    | 4.68    | 0.00001    | 0       | 0                                              | 132..971     | Yes | 2930, 2066             | 3356             |                  |                 |
| CARD10   | NM_014550.3    | 4.5     | 0.00001    | 0       | 2                                              | 4..3102      | Yes |                        | 3528, 3180       |                  |                 |
| SCML1    | NM_006746.3    | 4.49    | 0.00001    | 0       | 2                                              | 326..1234    | Yes | 2178                   | 2347             |                  |                 |
| C22orf13 | NM_031444.2    | 4.37    | 0.0017     | 0       | 3                                              | 317..1039    | Yes | 1343, 3571             |                  |                  | 1384            |
| KLHDC3   | NM_057161.2    | 4.35    | 0.00001    | 0       | 2                                              | 170..1318    | Yes | 1710, 1703             | 1344, 1651       |                  |                 |
| DCP2     | NM_152624.4    | 4.23    | 0.0001     | 0       | 0                                              | 199..1461    | Yes | 3466                   |                  |                  |                 |
| CMTM4    | NM_178818.2    | 4.17    | 0.0026     | 1       | 0                                              | 183..887     | Yes |                        | 2786             |                  | 2442            |
| AAMP     | NM_001087.2    | 4.08    | 0.00001    | 0       | 1                                              | 85..1389     | Yes | 1652                   |                  |                  |                 |
| TOP1     | NM_003286.2    | 4.07    | 0.0419     | 1       | 1                                              | 247..2544    | Yes |                        | 2707             |                  | 2605            |
| HBQ1     | NM_005331.3    | 4.03    | 0.00001    | 0       | 0                                              | 152..580     | No  |                        |                  |                  |                 |
| PDXK     | NM_003681.3    | 3.98    | 0.001      | 0       | 6                                              | 199..1137    | Yes | 7278, 5532, 5687       | 6199, 4838, 5128 |                  |                 |
| PER2     | NM_022817.1    | 3.98    | 0.0108     | 1       | 1                                              | 238..4005    | Yes | 5057, 5598, 6196       |                  |                  | 6124            |
| KIAA1967 | NM_021174.4    | 3.73    | 0.00001    | 0       | 0                                              | 420..3191    | No  |                        |                  |                  |                 |
| KLHL23   | NM_144711.3    | 3.6     | 0.0009     | 0       | 0                                              | 339..2015    | No  |                        |                  |                  |                 |
| RALA     | NM_005402.2    | 3.59    | 0.0001     | 1       | 0                                              | 301..921     | Yes | 2759                   |                  |                  |                 |
| NOL5A    | NM_006392.2    | 3.58    | 0.00001    | 0       | 0                                              | 54..1838     | No  |                        |                  |                  |                 |
| CDC32    | NM_052849.2    | 3.53    | 0.0128     | 0       | 2                                              | 274..858     | Yes | 1245                   | 1654             |                  |                 |
| ALDH5A1  | NM_001080.3    | 3.46    | 0.0004     | 0       | 4                                              | 29..1675     | Yes | 2564, 2875             | 2745, 2720       |                  |                 |
| POLR2D   | NM_004805.2    | 3.43    | 0.00001    | 0       | 1                                              | 31..459      | Yes | 1186                   |                  |                  |                 |
| HIC2     | NM_015094.1    | 3.3     | 0.00001    | 1       | 4                                              | 231..2078    | Yes | 3393, 3567, 2566       | 4048, 2900, 5045 |                  |                 |
| SLC5A6   | NM_021095.1    | 3.26    | 0.016      | 0       | 1                                              | 392..2299    | Yes | 2760                   | 3035             |                  |                 |
| ALS2CR2  | NM_018571.4    | 3.23    | 0.00001    | 1       | 1                                              | 366..1622    | Yes | 1913                   |                  |                  | 2130            |
| DUS1L    | NM_022156.3    | 3.22    | 0.00001    | 0       | 0                                              | 203..1624    | No  | 4857, 3755, 6120, 6685 |                  |                  |                 |
| FZD4     | NM_012193.2    | 3.21    | 0.0028     | 0       | 3                                              | 307..1920    | Yes |                        |                  |                  |                 |
| MDC1     | NM_014641.1    | 3.16    | 0.0179     | 0       | 0                                              | 441..6710    | No  |                        |                  |                  |                 |
| NRIP1    | NM_003489.2    | 3.07    | 0.0083     | 0       | 0                                              | 599..4075    | No  |                        |                  |                  |                 |
| CCDC58   | NM_001017928.2 | 3.06    | 0.00001    | 1       | 0                                              | 4..438       | Yes |                        | 546              |                  |                 |
| KIAA0020 | NM_014878.3    | 3.05    | 0.0089     | 0       | 0                                              | 97..2043     | No  |                        |                  |                  |                 |
| MRPL27   | NM_016504.2    | 3.03    | 0.00001    | 0       | 0                                              | 32..478      | Yes | 668                    |                  |                  |                 |
| METAP2   | NM_006838.2    | 3.01    | 0.00001    | 0       | 0                                              | 135..1571    | No  |                        |                  |                  |                 |
| PRIM1    | NM_000946.2    | 3       | 0.0059     | 0       | 0                                              | 65..1327     | No  |                        |                  |                  |                 |
| GMFB     | NM_004124.2    | 2.99    | 0.0003     | 0       | 2                                              | 100..528     | Yes | 3614                   |                  |                  |                 |
| PTPLAD1  | NM_016395.1    | 2.98    | 0.0354     | 0       | 1                                              | 149..1237    | Yes | 1269, 2225             |                  |                  | 2902            |
| OXR1     | NM_005109.2    | 2.98    | 0.0042     | 0       | 1                                              | 343..1926    | Yes |                        | 3569             |                  |                 |
| SLC2A3   | NM_006931.1    | 2.96    | 0.0054     | 0       | 0                                              | 243..1733    | No  |                        |                  |                  |                 |
| LSM14A   | NM_015578.1    | 2.93    | 0.0052     | 0       | 1                                              | 197..1588    | Yes | 1976                   |                  |                  |                 |
| KIAA1970 | NM_133451.1    | 2.92    | 0.00001    | 0       | 0                                              | 33..1604     | Yes | 3246, 3784             |                  |                  |                 |
| BCL2L12  | NM_052842.2    | 2.91    | 0.00001    | 0       | 0                                              | 683..1213    | Yes |                        | 1395             |                  |                 |
| MIDN     | NM_177401.4    | 2.91    | 0.019      | 1       | 0                                              | 516..1922    | Yes |                        |                  |                  | 2810            |
| MARCKSL1 | NM_023009.4    | 2.91    | 0.00001    | 1       | 0                                              | 201..788     | Yes |                        | 1153             |                  |                 |
| TNIP2    | NM_024309.2    | 2.84    | 0.00001    | 0       | 0                                              | 46..1335     | No  |                        |                  |                  |                 |
| RFWD2    | NM_022457.5    | 2.8     | 0.00001    | 0       | 1                                              | 257..2452    | Yes | 2694                   |                  |                  |                 |
| MCM10    | NM_018518.3    | 2.76    | 0.00001    | 0       | 0                                              | 102..2726    | No  |                        |                  |                  |                 |
| KPNA6    | NM_012316.3    | 2.76    | 0.00001    | 0       | 2                                              | 89..1699     | Yes | 6854, 6531             |                  |                  |                 |
| ABCE1    | NM_002940.1    | 2.75    | 0.0005     | 0       | 0                                              | 444..2243    | No  |                        |                  |                  |                 |
| NEDD4L   | NM_015277.2    | 2.74    | 0.00001    | 1       | 1                                              | 114..2981    | Yes |                        | 4189             |                  |                 |
| CCAR1    | NM_018237.2    | 2.73    | 0.00001    | 0       | 0                                              | 120..3572    | No  | 1351, 2894, 2757, 2738 |                  |                  |                 |
| VHL      | NM_000551.2    | 2.72    | 0.0355     | 0       | 1                                              | 214..855     | Yes | 1403                   |                  |                  |                 |
| UBE2C    | NM_181802.1    | 2.71    | 0.041      | 0       | 0                                              | 838..1260    | Yes | 2962                   |                  |                  |                 |
| NETO2    | NM_018092.3    | 2.7     | 0.00001    | 0       | 0                                              | 386..1963    | Yes |                        |                  |                  |                 |
| SESN1    | NM_014454.1    | 2.7     | 0.0209     | 1       | 0                                              | 12..1667     | Yes |                        | 2149             |                  |                 |
| OGFR     | NM_007346.2    | 2.7     | 0.0038     | 0       | 0                                              | 36..2069     | No  |                        |                  |                  |                 |
| C9orf74  | NM_030914.1    | 2.67    | 0.0209     | 0       | 0                                              | 63..368      | Yes | 531                    |                  |                  |                 |
| CDCA7    | NM_145810.1    | 2.64    | 0.0348     | 0       | 0                                              | 132..1247    | No  |                        |                  |                  |                 |
| SLC29A4  | NM_153247.1    | 2.61    | 0.00001    | 0       | 1                                              | 162..1754    | Yes |                        | 1852             |                  |                 |
| ERBB3    | NM_001005915.1 | 2.61    | 0.0168     | 0       | 2                                              | 194..745     | No  |                        |                  |                  |                 |
| CGI-115  | NM_016052.2    | 2.59    | 0.0003     | 0       | 0                                              | 31..879      | Yes | 3568, 1747             |                  |                  |                 |
| CDKN1B   | NM_004064.2    | 2.57    | 0.0007     | 1       | 0                                              | 473..1069    | Yes |                        |                  |                  | 2321            |
| SLC11A2  | NM_000617.1    | 2.57    | 0.00001    | 0       | 1                                              | 89..1774     | Yes |                        | 3207             |                  |                 |
| GBAS     | NM_001483.1    | 2.57    | 0.0187     | 0       | 1                                              | 9..869       | No  |                        |                  |                  |                 |
| AGPAT3   | NM_020132.3    | 2.56    | 0.0007     | 1       | 2                                              | 223..1353    | Yes | 1486, 3932             |                  |                  | 3479            |
| CCL2     | NM_002982.3    | 2.54    | 0.00001    | 0       | 0                                              | 74..373      | No  |                        |                  |                  |                 |
| VPS35    | NM_018206.3    | 2.53    | 0.0208     | 0       | 0                                              | 100..2490    | No  |                        |                  |                  |                 |
| CCNB1    | NM_031966.2    | 2.52    | 0.0002     | 0       | 0                                              | 178..1479    | No  |                        |                  |                  |                 |
| GTF2E1   | NM_005513.1    | 2.51    | 0.0103     | 0       | 0                                              | 115..1434    | Yes | 2953                   |                  |                  |                 |
| CMTM3    | NM_144601.2    | 2.51    | 0.0015     | 0       | 2                                              | 252..542     | Yes |                        | 567, 692         |                  |                 |
| TOMM34   | NM_006809.4    | 2.5     | 0.00001    | 0       | 1                                              | 141..1070    | Yes |                        | 1619             |                  |                 |
| NUBPL    | NM_025152.1    | 2.48    | 0.00001    | 0       | 0                                              | 56..1015     | Yes | 2380                   |                  |                  |                 |
| KIAA0323 | NM_015299.1    | 2.46    | 0.0002     | 0       | 3                                              | 203..2239    | Yes | 4710                   | 4967, 5363       |                  |                 |
| LLGL1    | NM_004140.3    | 2.45    | 0.002      | 0       | 2                                              | 62..3256     | Yes | 3874                   |                  |                  | 3456            |
| MBD6     | NM_052897.3    | 2.44    | 0.0001     | 2       | 0                                              | 225..3236    | Yes |                        | 3391, 3285       |                  |                 |
| MCM4     | NM_005914.2    | 2.44    | 0.0426     | 0       | 1                                              | 212..2803    | Yes | 3234                   |                  |                  |                 |
| NFKBIA   | NM_020529.1    | 2.44    | 0.00001    | 0       | 0                                              | 111..1064    | No  |                        |                  |                  |                 |
| PAF1     | NM_019088.2    | 2.44    | 0.0001     | 0       | 0                                              | 176..1771    | Yes | 1845                   |                  |                  |                 |
| PSTPIP2  | NM_024430.3    | 2.43    | 0.0084     | 0       | 3                                              | 97..1101     | Yes | 2677                   | 1684, 1443       |                  |                 |
| PRKRIR   | NM_004705.2    | 2.43    | 0.0052     | 0       | 0                                              | 1..2286      | No  |                        |                  |                  |                 |
| PSME3    | NM_005789.2    | 2.43    | 0.0084     | 0       | 0                                              | 227..991     | No  |                        |                  |                  |                 |

|           |                |      |         |   |   |           |     |                                                                                            |            |      |
|-----------|----------------|------|---------|---|---|-----------|-----|--------------------------------------------------------------------------------------------|------------|------|
| PAK4      | NM_001014832.1 | 2.41 | 0.0055  | 1 | 0 | 163..1938 | Yes |                                                                                            | 2408       |      |
| USP10     | NM_005153.1    | 2.4  | 0.0266  | 0 | 1 | 143..2539 | Yes | 2985                                                                                       |            |      |
| KIAA0195  | NM_014738.2    | 2.4  | 0.0001  | 0 | 1 | 164..4234 | Yes | 4929                                                                                       | 4390       |      |
| VPS25     | NM_032353.2    | 2.39 | 0.0008  | 0 | 1 | 41..571   | Yes | 826                                                                                        |            |      |
| RRM2      | NM_001034.1    | 2.39 | 0.00001 | 0 | 0 | 195..1364 | Yes | 1632                                                                                       |            |      |
| PLAGL2    | NM_002657.2    | 2.38 | 0.00001 | 0 | 1 | 218..1708 | Yes | 1895                                                                                       | 2831       |      |
| SNTB1     | NM_021021.2    | 2.38 | 0.0005  | 0 | 1 | 227..1843 | Yes |                                                                                            | 2522       |      |
| ADPGK     | NM_031284.3    | 2.37 | 0.0005  | 0 | 1 | 95..1585  | Yes |                                                                                            | 2345       |      |
| N-PAC     | NM_032569.2    | 2.36 | 0.0052  | 0 | 2 | 38..1699  | Yes | 2212, 2559                                                                                 |            |      |
| GTF3C2    | NM_001521.1    | 2.36 | 0.0009  | 0 | 0 | 364..3099 | No  |                                                                                            |            |      |
| LOC129531 | NM_138798.1    | 2.35 | 0.00001 | 0 | 0 | 49..798   | No  |                                                                                            |            |      |
| S100P     | NM_005980.2    | 2.35 | 0.0146  | 0 | 1 | 95..382   | Yes |                                                                                            | 465        |      |
| SUMO3     | NM_006936.2    | 2.35 | 0.00001 | 0 | 0 | 162..473  | No  |                                                                                            |            |      |
| PHOSPHO2  | NM_001008489.2 | 2.35 | 0.00001 | 0 | 0 | 389..1114 | No  |                                                                                            |            |      |
| NCBP2     | NM_007362.2    | 2.35 | 0.0384  | 0 | 0 | 91..561   | No  |                                                                                            |            |      |
| MYC       | NM_002467.3    | 2.35 | 0.00001 | 0 | 1 | 525..1889 | Yes | 2357                                                                                       |            |      |
| HMGB2     | NM_002129.2    | 2.34 | 0.0378  | 0 | 0 | 194..823  | No  |                                                                                            |            |      |
| MGC40405  | NM_152789.1    | 2.34 | 0.00001 | 0 | 0 | 102..845  | No  |                                                                                            |            |      |
| MED16     | NM_005481.2    | 2.32 | 0.00001 | 0 | 0 | 152..2785 | No  |                                                                                            |            |      |
| FBXO34    | NM_017943.2    | 2.31 | 0.0179  | 0 | 0 | 246..2381 | No  |                                                                                            |            |      |
| H2AFX     | NM_002105.2    | 2.3  | 0.0117  | 2 | 0 | 74..505   | Yes |                                                                                            | 593        | 1475 |
| TCEA3     | NM_003196.1    | 2.3  | 0.0043  | 0 | 0 | 136..1182 | No  |                                                                                            |            |      |
| BCL2L2    | NM_004050.2    | 2.29 | 0.0006  | 0 | 1 | 189..770  | Yes | 1587                                                                                       | 2118       |      |
| SLC7A2    | NM_003046.2    | 2.28 | 0.0217  | 0 | 0 | 31..2124  | Yes | 5726, 5861, 6078                                                                           |            |      |
| MAP2K1IP1 | NM_021970.2    | 2.28 | 0.0001  | 0 | 0 | 250..624  | Yes | 2289, 4130, 955                                                                            |            |      |
| DHCR24    | NM_014762.2    | 2.27 | 0.0249  | 0 | 2 | 130..1680 | Yes |                                                                                            | 1950, 2977 |      |
| SLC35B2   | NM_178148.1    | 2.27 | 0.0076  | 0 | 1 | 137..1435 | Yes | 1955                                                                                       | 1641       |      |
| PDPK1     | NM_002613.3    | 2.27 | 0.00001 | 0 | 0 | 145..1815 | Yes | 3556, 6231, 2613                                                                           |            |      |
| RPL7L1    | NM_198486.2    | 2.26 | 0.0003  | 0 | 1 | 6..746    | Yes | 1219                                                                                       |            |      |
| STK35     | NM_080836.2    | 2.25 | 0.0002  | 0 | 1 | 1..1206   | Yes | 3360                                                                                       | 2643       |      |
|           |                |      |         |   |   |           |     | 8389, 6655,<br>10584, 4920,<br>9582, 3031, 9957,<br>3747, 8075, 3274,<br>6242, 5935, 9982, |            |      |
| CYP20A1   | NM_177538.1    | 2.24 | 0.0001  | 0 | 9 | 623..2011 | Yes | 8741, 4444                                                                                 | 3964       |      |
| SLC7A1    | NM_003045.3    | 2.24 | 0.00001 | 0 | 2 | 388..2277 | Yes |                                                                                            | 3964       | 6504 |
| COP57A    | NM_016319.1    | 2.23 | 0.0167  | 0 | 0 | 142..969  | No  |                                                                                            |            |      |
| RNF144A   | NM_014746.2    | 2.23 | 0.039   | 0 | 1 | 443..1321 | Yes | 3350, 3189                                                                                 | 4709       |      |
| NKD1      | NM_033119.3    | 2.21 | 0.00001 | 0 | 0 | 225..1637 | No  |                                                                                            |            |      |
| NET1      | NM_005863.2    | 2.21 | 0.0371  | 1 | 0 | 184..1812 | Yes | 2610                                                                                       |            |      |
| STX16     | NM_001001433.1 | 2.21 | 0.0179  | 0 | 1 | 736..1713 | Yes | 4189, 4005                                                                                 | 3636       |      |
| C1orf106  | NM_018265.1    | 2.2  | 0.00001 | 0 | 3 | 1..1992   | Yes | 3095, 2317                                                                                 | 3919       |      |
| IQCB1     | NM_001023570.1 | 2.19 | 0.0104  | 0 | 0 | 216..2012 | No  |                                                                                            |            |      |
| HSF2      | NM_004506.2    | 2.18 | 0.0134  | 0 | 0 | 188..1798 | Yes | 2435                                                                                       |            |      |
| DTL       | NM_016448.1    | 2.18 | 0.00001 | 0 | 1 | 315..2507 | Yes |                                                                                            | 3547       |      |
| MTF2      | NM_007358.1    | 2.17 | 0.0048  | 0 | 0 | 242..2023 | No  |                                                                                            |            |      |
| WDR21A    | NM_181340.1    | 2.16 | 0.0011  | 0 | 0 | 376..1563 | No  |                                                                                            |            |      |
| PACSIN3   | NM_016223.3    | 2.16 | 0.0005  | 0 | 0 | 163..1437 | No  |                                                                                            |            |      |
| M6PRBP1   | NM_005817.3    | 2.16 | 0.00001 | 0 | 3 | 74..1378  | Yes | 1827, 1915                                                                                 | 1583, 2125 |      |
| ARHGEF7   | NM_003899.2    | 2.14 | 0.00001 | 0 | 0 | 498..2438 | No  |                                                                                            |            |      |
| LSM12     | NM_152344.1    | 2.14 | 0.00001 | 0 | 0 | 51..638   | No  |                                                                                            |            |      |
| GYG2      | NM_003918.1    | 2.14 | 0.0001  | 0 | 0 | 283..1788 | No  |                                                                                            |            |      |
| TNFAIP3   | NM_006290.2    | 2.14 | 0.0011  | 0 | 0 | 67..2439  | No  |                                                                                            |            |      |
| ATAD3A    | NM_018188.2    | 2.14 | 0.0001  | 0 | 1 | 95..1999  | Yes |                                                                                            | 2325       |      |
| MATR3     | NM_018834.4    | 2.13 | 0.0178  | 1 | 0 | 318..2861 | Yes |                                                                                            | 3284       |      |
| EXOSC8    | NM_181503.1    | 2.12 | 0.0003  | 0 | 0 | 27..857   | No  |                                                                                            |            |      |
| MGC2747   | NM_024104.2    | 2.11 | 0.002   | 0 | 0 | 48..275   | Yes | 1248                                                                                       |            |      |
| E2F2      | NM_004091.2    | 2.11 | 0.00001 | 0 | 0 | 429..1742 | No  |                                                                                            |            |      |
| GNPAT     | NM_014236.1    | 2.11 | 0.0018  | 0 | 0 | 144..2186 | No  |                                                                                            |            |      |
| HRB       | NM_004504.3    | 2.1  | 0.0273  | 0 | 0 | 251..1939 | Yes | 4296                                                                                       | 7009       |      |
| CDC2      | NM_033379.2    | 2.1  | 0.0002  | 0 | 0 | 26..748   | No  |                                                                                            |            |      |
| MED24     | NM_014815.2    | 2.1  | 0.0014  | 0 | 0 | 314..3283 | No  |                                                                                            |            |      |
| BTBD3     | NM_014962.2    | 2.09 | 0.00001 | 0 | 0 | 360..1928 | No  |                                                                                            |            |      |
| C19orf22  | NM_138774.2    | 2.08 | 0.00001 | 0 | 0 | 69..875   | Yes | 1537                                                                                       |            |      |
| DSC2      | NM_004949.2    | 2.07 | 0.0003  | 0 | 1 | 455..2998 | Yes | 4490                                                                                       |            |      |
| RHOT2     | NM_138769.1    | 2.07 | 0.00001 | 0 | 0 | 68..1924  | No  |                                                                                            |            |      |
| MRPL40    | NM_003776.2    | 2.07 | 0.0002  | 0 | 0 | 1..787    | No  |                                                                                            |            |      |
| UGDH      | NM_003359.2    | 2.06 | 0.0002  | 0 | 2 | 317..1801 | Yes | 2101, 2177                                                                                 |            |      |
| LOC130074 | NM_001009993.1 | 2.06 | 0.0234  | 0 | 5 | 230..817  | Yes | 3848, 3747                                                                                 | 3962, 5248 | 2572 |
| NOTUM     | NM_178493.3    | 2.05 | 0.0143  | 0 | 0 | 477..1769 | No  |                                                                                            |            |      |
| SULT2A1   | NM_003167.2    | 2.05 | 0.00001 | 0 | 1 | 80..937   | Yes | 1474                                                                                       |            |      |
| FLJ11259  | NM_018370.1    | 2.05 | 0.028   | 0 | 0 | 464..1180 | Yes | 2961, 2801                                                                                 | 2935       |      |
| C1orf135  | NM_024037.1    | 2.03 | 0.0034  | 0 | 0 | 1..1074   | No  |                                                                                            |            |      |
| SLC25A15  | NM_014252.1    | 2.03 | 0.00001 | 0 | 1 | 273..1178 | Yes |                                                                                            | 1194       |      |
| DSCR3     | NM_006052.1    | 2.02 | 0.0001  | 0 | 4 | 240..1133 | Yes | 2409, 2631, 1955                                                                           | 2607       |      |
| PSMD1     | NM_002807.2    | 2.02 | 0.00001 | 0 | 0 | 132..2993 | No  |                                                                                            |            |      |
| CIRBP     | NM_001280.1    | 2.02 | 0.00001 | 0 | 0 | 150..668  | No  |                                                                                            |            |      |
| C20orf44  | NM_018244.3    | 2.01 | 0.0005  | 0 | 1 | 68..238   | Yes |                                                                                            | 1959       |      |
| NEK6      | NM_014397.3    | 2.01 | 0.00001 | 0 | 1 | 146..1087 | Yes | 1478                                                                                       | 1935       |      |
| C14orf108 | NM_018229.2    | 2.01 | 0.0011  | 0 | 1 | 407..1879 | Yes |                                                                                            |            | 2227 |
| MED22     | NM_181491.1    | 2.01 | 0.0055  | 0 | 0 | 235..657  | Yes |                                                                                            | 3726, 3269 |      |
| FLJ14803  | NM_032842.2    | 2    | 0.0038  | 0 | 1 | 124..1809 | Yes |                                                                                            | 1876       |      |
| FOXQ1     | NM_033260.2    | 1.97 | 0.0036  | 0 | 0 | 266..1477 | No  |                                                                                            |            |      |

|                 |                |      |         |   |   |           |     |                                                 |             |
|-----------------|----------------|------|---------|---|---|-----------|-----|-------------------------------------------------|-------------|
| AK3             | NM_016282.2    | 1.95 | 0.0056  | 0 | 0 | 141..824  | No  |                                                 |             |
| FAH             | NM_000137.1    | 1.95 | 0.0212  | 0 | 0 | 57..1316  | No  |                                                 |             |
| ACD             | NM_022914.1    | 1.95 | 0.0241  | 0 | 0 | 338..1963 | No  |                                                 |             |
| NR0B2           | NM_021969.1    | 1.94 | 0.0131  | 0 | 0 | 137..910  | No  |                                                 |             |
| AKAP7           | NM_016377.2    | 1.93 | 0.00001 | 0 | 0 | 12..992   | No  |                                                 |             |
| CCDC59          | NM_014167.1    | 1.92 | 0.0029  | 0 | 0 | 18..743   | No  |                                                 |             |
| C16orf9         | NM_032039.1    | 1.91 | 0.0155  | 0 | 0 | 165..1823 | Yes | 2914                                            | 2497        |
| LOC389541       | NM_001008395.1 | 1.91 | 0.00001 | 0 | 0 | 67..366   | No  |                                                 |             |
| RBM13           | NM_032509.2    | 1.9  | 0.0109  | 0 | 0 | 41..943   | No  |                                                 |             |
| SDCCAG10        | NM_005869.2    | 1.89 | 0.0105  | 0 | 0 | 220..1638 | No  |                                                 |             |
| ADRM1           | NM_007002.2    | 1.89 | 0.0287  | 0 | 0 | 81..1304  | No  |                                                 |             |
| FEN1            | NM_004111.4    | 1.89 | 0.00001 | 0 | 0 | 373..1515 | No  |                                                 |             |
| NASP            | NM_002482.2    | 1.87 | 0.0053  | 0 | 0 | 103..2469 | Yes | 2906                                            |             |
| PCGF6           | NM_032154.3    | 1.87 | 0.00001 | 0 | 0 | 69..896   | No  |                                                 |             |
| APBPB1          | NM_003905.3    | 1.87 | 0.0001  | 0 | 0 | 78..1682  | No  |                                                 |             |
| <b>TSPAN14</b>  | NM_030927.1    | 1.85 | 0.00001 | 1 | 1 | 108..920  | Yes | 4811                                            | 1518, 944   |
| CSTF3           | NM_001033505.1 | 1.84 | 0.0013  | 0 | 0 | 167..478  | No  |                                                 |             |
| TAF15           | NM_003487.2    | 1.84 | 0.0001  | 0 | 0 | 87..1856  | No  |                                                 |             |
| ARL1            | NM_001177.3    | 1.83 | 0.0171  | 0 | 0 | 150..695  | No  |                                                 |             |
| TUBGCP2         | NM_006659.1    | 1.83 | 0.0018  | 0 | 0 | 358..3066 | No  |                                                 |             |
| SNRPD3          | NM_004175.3    | 1.83 | 0.0081  | 0 | 0 | 441..821  | No  |                                                 |             |
| PCK2            | NM_001018073.1 | 1.82 | 0.0011  | 0 | 0 | 133..1458 | No  |                                                 |             |
| ARS2            | NM_015908.4    | 1.82 | 0.0088  | 0 | 0 | 269..2899 | No  |                                                 |             |
| CHD8            | NM_020920.1    | 1.81 | 0.0212  | 0 | 0 | 95..7003  | No  |                                                 |             |
| NCOA6           | NM_014071.2    | 1.81 | 0.0007  | 0 | 0 | 323..6514 | Yes | 6688                                            |             |
| <b>GA2</b>      | NM_015044.3    | 1.81 | 0.00001 | 0 | 3 | 77..1918  | Yes | 4288, 3831, 3697                                | 4373, 3219  |
| <b>EIF2S3</b>   | NM_001415.2    | 1.8  | 0.00001 | 0 | 2 | 22..1440  | Yes | 2962, 2002                                      |             |
| <b>TRIB3</b>    | NM_021158.3    | 1.79 | 0.0003  | 0 | 1 | 507..1583 | Yes |                                                 | 1660        |
| PHF16           | NM_014735.2    | 1.79 | 0.00001 | 0 | 0 | 299..2770 | No  |                                                 |             |
| CTCF            | NM_006565.2    | 1.78 | 0.0306  | 0 | 0 | 291..2474 | No  |                                                 |             |
| <b>C15orf39</b> | NM_015492.3    | 1.77 | 0.00001 | 0 | 1 | 231..3374 | Yes | 4374, 4300                                      | 3687        |
| ALG5            | NM_013338.3    | 1.77 | 0.003   | 0 | 0 | 41..1015  | No  |                                                 |             |
| CTDSP1          | NM_021198.1    | 1.76 | 0.0023  | 0 | 0 | 337..1122 | No  |                                                 |             |
| <b>ADD3</b>     | NM_016824.3    | 1.75 | 0.00001 | 0 | 2 | 377..2497 | Yes | 4031, 4332                                      |             |
| SERGEF          | NM_012139.2    | 1.75 | 0.00001 | 0 | 0 | 81..1457  | No  |                                                 |             |
| NARF            | NM_031968.1    | 1.75 | 0.00001 | 0 | 0 | 41..1649  | No  |                                                 |             |
| TNPO3           | NM_012470.2    | 1.75 | 0.0011  | 0 | 0 | 375..3146 | No  |                                                 |             |
| <b>MMS19</b>    | NM_022362.2    | 1.75 | 0.0276  | 0 | 1 | 64..3219  | Yes | 3275                                            |             |
| C8orf42         | NM_175075.2    | 1.74 | 0.0001  | 0 | 0 | 575..1132 | No  |                                                 |             |
| C18orf56        | NM_001012716.1 | 1.74 | 0.0372  | 0 | 0 | 94..465   | Yes | 785                                             |             |
| C8orf33         | NM_023080.1    | 1.74 | 0.0077  | 0 | 0 | 55..744   | Yes | 1985                                            |             |
| KIAA0690        | NM_015179.2    | 1.73 | 0.0166  | 0 | 0 | 78..3971  | No  |                                                 |             |
| CHFR            | NM_018223.1    | 1.72 | 0.0103  | 0 | 0 | 65..1936  | Yes | 3120                                            |             |
| C21orf45        | NM_018944.2    | 1.72 | 0.0222  | 0 | 0 | 52..753   | Yes | 925                                             |             |
| ACTL6A          | NM_177989.1    | 1.71 | 0.0385  | 0 | 0 | 156..1319 | No  |                                                 |             |
| EXOSC3          | NM_016042.2    | 1.71 | 0.0016  | 0 | 0 | 25..852   | No  |                                                 |             |
| <b>COMMD9</b>   | NM_014186.1    | 1.71 | 0.0043  | 0 | 1 | 18..614   | Yes |                                                 | 1123        |
| C7orf30         | NM_138446.1    | 1.7  | 0.00001 | 0 | 0 | 33..737   | No  |                                                 |             |
| ALG1            | NM_019109.3    | 1.7  | 0.0196  | 0 | 0 | 42..1436  | No  |                                                 |             |
| <b>ACACA</b>    | NM_198834.1    | 1.68 | 0.0102  | 0 | 2 | 514..858  | Yes | 8402, 2660, 8190                                | 9278        |
| <b>FNTB</b>     | NM_002028.3    | 1.68 | 0.0187  | 0 | 1 | 166..1479 | Yes |                                                 | 2084        |
| <b>PPM1F</b>    | NM_014634.2    | 1.68 | 0.0049  | 0 | 3 | 115..1479 | Yes | 4700, 4338                                      | 4535, 3927  |
| UNG             | NM_003362.2    | 1.67 | 0.0008  | 0 | 0 | 126..1040 | No  |                                                 |             |
| <b>CTDSP2</b>   | NM_005730.2    | 1.66 | 0.00001 | 0 | 1 | 530..1345 | Yes | 2604                                            | 2013        |
| C1orf171        | NM_138467.1    | 1.66 | 0.0286  | 0 | 0 | 90..869   | No  |                                                 |             |
| <b>FLJ10847</b> | NM_018242.2    | 1.66 | 0.00001 | 0 | 1 | 87..1799  | Yes | 2723                                            |             |
| <b>GPR172A</b>  | NM_024531.3    | 1.66 | 0.00001 | 0 | 1 | 1..1338   | No  |                                                 |             |
| PA2G4           | NM_006191.1    | 1.66 | 0.00001 | 0 | 0 | 20..1604  | No  |                                                 |             |
| KIAA0100        | NM_014680.2    | 1.65 | 0.0334  | 0 | 0 | 100..6807 | No  |                                                 |             |
| MRPS24          | NM_032014.1    | 1.64 | 0.0221  | 0 | 0 | 52..555   | No  |                                                 |             |
| <b>CSK</b>      | NM_004383.1    | 1.64 | 0.0077  | 1 | 0 | 703..2055 | Yes |                                                 | 2143        |
| WBSCR1          | NM_022170.1    | 1.64 | 0.00001 | 0 | 0 | 9..755    | No  |                                                 |             |
| TBPL1           | NM_004865.2    | 1.64 | 0.0001  | 0 | 0 | 308..868  | No  |                                                 |             |
| VRK1            | NM_003384.2    | 1.64 | 0.00001 | 0 | 0 | 107..1297 | No  |                                                 |             |
| ZNF317          | NM_020933.2    | 1.63 | 0.0039  | 0 | 0 | 276..2063 | No  |                                                 |             |
| <b>ZBED1</b>    | NM_004729.3    | 1.62 | 0.0275  | 0 | 2 | 202..2286 | Yes | 3482, 3457                                      | 4074        |
| NUP54           | NM_017426.2    | 1.62 | 0.0001  | 0 | 0 | 129..1652 | No  |                                                 |             |
| PDLIM7          | NM_213636.1    | 1.61 | 0.0037  | 0 | 1 | 86..754   | Yes |                                                 | 873         |
| SNRPB2          | NM_003092.3    | 1.59 | 0.0011  | 0 | 0 | 217..894  | No  |                                                 |             |
| C4orf9          | NM_003703.1    | 1.59 | 0.0259  | 0 | 0 | 73..2646  | No  |                                                 |             |
| <b>ANPEP</b>    | NM_001150.1    | 1.57 | 0.0043  | 0 | 1 | 293..3196 | Yes | 3346                                            |             |
| <b>RAP2C</b>    | NM_021183.3    | 1.56 | 0.005   | 1 | 0 | 785..1336 | Yes |                                                 | 1434        |
| EIF4G3          | NM_003760.2    | 1.55 | 0.0002  | 0 | 0 | 582..5339 | No  |                                                 |             |
| DDHD2           | NM_015214.1    | 1.55 | 0.0307  | 0 | 0 | 280..2415 | No  |                                                 |             |
| <b>ADD1</b>     | NM_001119.3    | 1.55 | 0.00001 | 0 | 2 | 189..2402 | Yes |                                                 | 3662, 2722  |
| ABCB10          | NM_012089.1    | 1.55 | 0.0025  | 0 | 0 | 44..2260  | No  |                                                 |             |
| MGC15416        | NM_138418.2    | 1.55 | 0.0003  | 0 | 0 | 144..626  | No  |                                                 |             |
| BEX1            | NM_018476.3    | 1.55 | 0.0304  | 0 | 0 | 241..618  | No  |                                                 |             |
| <b>ARHGEF18</b> | NM_015318.2    | 1.54 | 0.0031  | 0 | 3 | 207..3254 | Yes | 3292, 4266, 3613<br>7370, 6896,<br>10762, 3306, | 4807        |
| ZDHC3           | NM_016598.1    | 1.54 | 0.0282  | 0 | 0 | 275..1258 | Yes | 4797, 5005, 4409                                | 9208, 12498 |
| RCE1            | NM_001032279.1 | 1.54 | 0.0018  | 0 | 0 | 353..1030 | No  |                                                 |             |
| MRPS22          | NM_020191.2    | 1.53 | 0.00001 | 0 | 0 | 9..1091   | No  |                                                 |             |

|          |             |      |        |   |   |           |    |
|----------|-------------|------|--------|---|---|-----------|----|
| THOP1    | NM_003249.3 | 1.53 | 0.0239 | 0 | 0 | 156..2225 | No |
| C13orf23 | NM_025138.2 | 1.52 | 0.0264 | 0 | 0 | 874..3708 | No |
| C6orf130 | NM_145063.2 | 1.52 | 0.0008 | 0 | 0 | 173..631  | No |
| ZMYND19  | NM_138462.2 | 1.52 | 0.0002 | 0 | 0 | 223..906  | No |
| TINP1    | NM_014886.2 | 1.52 | 0.0062 | 0 | 0 | 84..866   | No |
| SMBP     | NM_020123.2 | 1.51 | 0.0009 | 0 | 0 | 218..1987 | No |
| TOMM22   | NM_020243.4 | 1.51 | 0.0026 | 0 | 0 | 31..459   | No |
| UBE3A    | NM_130839.1 | 1.51 | 0.0077 | 0 | 0 | 658..3276 | No |

The Z-ratio is the ratio of the normalized microarray signal of the gene from total RNA obtained from control (Ctl) miRNA-transfected cells compared to the signal for the gene from miR-24 mimic-transfected cells. The p-value gives the probability that the mRNA is over-represented in the miR-24 down-regulated genes. Genes highlighted in yellow have conserved binding sites for miR-24; those in red are the transcripts that are non-conserved miR-24 targets by TargetScan 4.2. Numbers in columns G show the location of the coding region (CDS). The presence or absence of a perfect hexamer, heptamer or octamer seed for a gene is shown in Column H as a "Yes" or "No". Numbers in columns I-K correspond to the sixth, seventh or eighth nucleotide of a perfect 6-mer (Hexamer), 7-mer (Heptamer) or 8-mer (Octamer) seed. Perfect seeds have exact match for a 6-mer, 7-mer or 8-mer sequence complementary to nucleotides 2-7, 2-8 or 2-9 at the 5'-end of miR-24. Presence of a miR-24 seed was identified by using PITA ([http://132.77.150.113/pubs/mir07/mir07\\_prediction.html](http://132.77.150.113/pubs/mir07/mir07_prediction.html)). The miR-24 mature miRNA sequence was obtained from miRBase ([www.mirbase.com](http://www.mirbase.com)).

**Suppl. Table 2. Significantly over-represented GO processes amongst 248 genes down-regulated by miR-24.**

| Gene Ontology (GO) Process                                                                     | # of genes in data set | # in GO process | % of genes | p-value< | Score |
|------------------------------------------------------------------------------------------------|------------------------|-----------------|------------|----------|-------|
| biopolymer metabolic process                                                                   | 131                    | 5717            | 2.29       | 2.07E-08 | 7.68  |
| cellular macromolecule metabolic process                                                       | 140                    | 6549            | 2.14       | 4.5E-07  | 6.34  |
| macromolecule metabolic process                                                                | 140                    | 6671            | 2.10       | 1.54E-06 | 5.81  |
| primary metabolic process                                                                      | 159                    | 7932            | 2.00       | 2.19E-06 | 5.66  |
| cellular metabolic process                                                                     | 162                    | 8237            | 1.97       | 5.78E-06 | 5.24  |
| nucleobase, nucleoside, nucleotide and nucleic acid metabolic process                          | 87                     | 3724            | 2.34       | 1.35E-05 | 4.87  |
| DNA metabolic process                                                                          | 25                     | 625             | 4.00       | 1.36E-05 | 4.87  |
| arginine transport                                                                             | 3                      | 4               | 75.00      | 1.44E-05 | 4.84  |
| ornithine transport                                                                            | 3                      | 4               | 75.00      | 1.44E-05 | 4.84  |
| cellular biopolymer metabolic process                                                          | 88                     | 3839            | 2.29       | 2.51E-05 | 4.6   |
| DNA replication                                                                                | 14                     | 248             | 5.65       | 3.23E-05 | 4.49  |
| RNA metabolic process                                                                          | 36                     | 1148            | 3.14       | 3.72E-05 | 4.43  |
| protein-DNA complex assembly                                                                   | 14                     | 252             | 5.56       | 3.85E-05 | 4.41  |
| transcription initiation                                                                       | 9                      | 111             | 8.11       | 5.53E-05 | 4.26  |
| metabolic process                                                                              | 167                    | 8846            | 1.89       | 5.85E-05 | 4.23  |
| DNA damage checkpoint                                                                          | 6                      | 46              | 13.04      | 7.11E-05 | 4.15  |
| transcription initiation from RNA polymerase II promoter                                       | 8                      | 90              | 8.89       | 7.5E-05  | 4.13  |
| cell cycle                                                                                     | 31                     | 962             | 3.22       | 8.27E-05 | 4.08  |
| DNA unwinding during replication                                                               | 4                      | 17              | 23.53      | 0.000113 | 3.95  |
| cellular macromolecule catabolic process                                                       | 28                     | 844             | 3.32       | 0.000115 | 3.94  |
| basic amino acid transport                                                                     | 3                      | 7               | 42.86      | 0.000121 | 3.92  |
| DNA integrity checkpoint                                                                       | 6                      | 51              | 11.76      | 0.000128 | 3.92  |
| macromolecular complex assembly                                                                | 29                     | 901             | 3.22       | 0.000145 | 3.84  |
| modification-dependent protein catabolic process                                               | 22                     | 596             | 3.69       | 0.000146 | 3.84  |
| modification-dependent macromolecule catabolic process                                         | 22                     | 596             | 3.69       | 0.000146 | 3.84  |
| ubiquitin-dependent protein catabolic process                                                  | 22                     | 596             | 3.69       | 0.000146 | 3.84  |
| proteolysis involved in cellular protein catabolic process                                     | 22                     | 604             | 3.64       | 0.000177 | 3.75  |
| cellular protein catabolic process                                                             | 22                     | 607             | 3.62       | 0.00019  | 3.72  |
| macromolecule catabolic process                                                                | 28                     | 878             | 3.19       | 0.000221 | 3.66  |
| lysine transport                                                                               | 2                      | 2               | 100.00     | 0.000237 | 3.63  |
| DNA duplex unwinding                                                                           | 4                      | 21              | 19.05      | 0.00027  | 3.57  |
| DNA geometric change                                                                           | 4                      | 21              | 19.05      | 0.00027  | 3.57  |
| macromolecular complex subunit organization                                                    | 29                     | 937             | 3.09       | 0.000281 | 3.55  |
| biopolymer catabolic process                                                                   | 25                     | 767             | 3.26       | 0.000352 | 3.45  |
| protein catabolic process                                                                      | 22                     | 636             | 3.46       | 0.000362 | 3.44  |
| response to DNA damage stimulus                                                                | 18                     | 473             | 3.81       | 0.000412 | 3.39  |
| cellular catabolic process                                                                     | 35                     | 1247            | 2.81       | 0.000412 | 3.39  |
| DNA-dependent DNA replication                                                                  | 7                      | 89              | 7.87       | 0.000451 | 3.35  |
| anti-apoptosis                                                                                 | 12                     | 257             | 4.67       | 0.000669 | 3.17  |
| cellular component assembly                                                                    | 29                     | 989             | 2.93       | 0.000673 | 3.17  |
| cytoplasmic sequestering of transcription factor                                               | 3                      | 12              | 25.00      | 0.000721 | 3.14  |
| deoxyribonucleotide biosynthetic process                                                       | 3                      | 12              | 25.00      | 0.000721 | 3.14  |
| anaphase-promoting complex-dependent proteasomal ubiquitin-dependent protein catabolic process | 6                      | 70              | 8.57       | 0.000731 | 3.14  |
| cell cycle checkpoint                                                                          | 7                      | 98              | 7.14       | 0.000805 | 3.09  |
| cellular response to DNA damage stimulus                                                       | 16                     | 419             | 3.82       | 0.000827 | 3.08  |
| cytoplasmic sequestering of protein                                                            | 3                      | 13              | 23.08      | 0.000926 | 3.03  |
| RNA elongation                                                                                 | 6                      | 75              | 8.00       | 0.001053 | 2.98  |
| positive regulation of ubiquitin-protein ligase activity during mitotic cell cycle             | 6                      | 75              | 8.00       | 0.001053 | 2.98  |
| positive regulation of ubiquitin-protein ligase activity                                       | 6                      | 76              | 7.89       | 0.001129 | 2.95  |
| catabolic process                                                                              | 36                     | 1373            | 2.62       | 0.001175 | 2.93  |

For each GO process, the number of genes in the data set is compared to the number of genes assigned to the GO process. The percent of genes in the data set that are also assigned to the GO process is given and used to determine the probability that the GO process is over-represented in the data set. p-value gives the probability that a process is over-represented upon miR-24 overexpression. The Score is defined as  $-\log[p\text{-value}]$ .

**Suppl. Table 3. Significantly over-represented GO processes amongst genes down-regulated by miR-24 that are also predicted miR-24 targets by TargetScan 4.2 (conserved or nonconserved)**

| Gene Ontology (GO) Process                              | # of genes in data set | # in GO process | % of genes | p-value< | Score |
|---------------------------------------------------------|------------------------|-----------------|------------|----------|-------|
| DNA damage checkpoint                                   | 4                      | 44              | 9.1        | 1.18E-04 | 3.93  |
| double-strand break repair via homologous recombination | 3                      | 17              | 17.65      | 1.19E-04 | 3.93  |
| recombinational repair                                  | 3                      | 17              | 17.65      | 1.19E-04 | 3.93  |
| regulation of cell cycle                                | 12                     | 598             | 2.01       | 1.59E-04 | 3.8   |
| DNA integrity checkpoint                                | 4                      | 49              | 8.17       | 1.80E-04 | 3.75  |
| post-translational protein modification                 | 22                     | 1719            | 1.28       | 2.33E-04 | 3.64  |
| protein modification process                            | 24                     | 2027            | 1.19       | 3.67E-04 | 3.44  |
| biopolymer modification                                 | 24                     | 2100            | 1.15       | 6.19E-04 | 3.21  |
| cell cycle arrest                                       | 5                      | 122             | 4.1        | 6.95E-04 | 3.16  |
| macromolecular complex assembly                         | 13                     | 821             | 1.59       | 8.21E-04 | 3.09  |
| cell cycle                                              | 15                     | 1061            | 1.42       | 1.02E-03 | 3     |
| negative regulation of cell cycle                       | 7                      | 276             | 2.54       | 1.07E-03 | 2.98  |
| DNA damage response, signal transduction                | 4                      | 80              | 5          | 1.17E-03 | 2.94  |
| DNA recombination                                       | 5                      | 138             | 3.63       | 1.21E-03 | 2.92  |
| cell cycle checkpoint                                   | 4                      | 91              | 4.4        | 1.88E-03 | 2.73  |
| protein metabolic process                               | 36                     | 4026            | 0.9        | 2.12E-03 | 2.68  |
| cellular component assembly                             | 13                     | 914             | 1.43       | 2.16E-03 | 2.67  |
| response to DNA damage stimulus                         | 8                      | 401             | 2          | 2.18E-03 | 2.67  |
| DNA metabolic process                                   | 10                     | 605             | 1.66       | 2.49E-03 | 2.61  |
| double-strand break repair                              | 3                      | 48              | 6.25       | 2.66E-03 | 2.58  |
| NLS-bearing substrate import into nucleus               | 2                      | 15              | 13.34      | 3.29E-03 | 2.49  |
| interphase                                              | 5                      | 178             | 2.81       | 3.67E-03 | 2.44  |
| I-kappaB kinase/NF-kappaB cascade                       | 5                      | 190             | 2.64       | 4.83E-03 | 2.32  |
| negative regulation of cell proliferation               | 7                      | 371             | 1.89       | 5.58E-03 | 2.26  |
| UDP-glucuronate biosynthetic process                    | 1                      | 1               | 100        | 5.77E-03 | 2.24  |
| plasminogen activation                                  | 1                      | 1               | 100        | 5.77E-03 | 2.24  |
| ferrous iron transport                                  | 1                      | 1               | 100        | 5.77E-03 | 2.24  |
| biotin transport                                        | 1                      | 1               | 100        | 5.77E-03 | 2.24  |
| glucuronate biosynthetic process                        | 1                      | 1               | 100        | 5.77E-03 | 2.24  |
| pantothenate transport                                  | 1                      | 1               | 100        | 5.77E-03 | 2.24  |
| meiosis                                                 | 4                      | 126             | 3.18       | 6.06E-03 | 2.22  |
| M phase of meiotic cell cycle                           | 4                      | 126             | 3.18       | 6.06E-03 | 2.22  |
| regulation of protein kinase activity                   | 7                      | 377             | 1.86       | 6.08E-03 | 2.22  |
| DNA unwinding during replication                        | 2                      | 21              | 9.53       | 6.43E-03 | 2.2   |
| meiotic cell cycle                                      | 4                      | 129             | 3.11       | 6.58E-03 | 2.19  |
| regulation of kinase activity                           | 7                      | 386             | 1.82       | 6.89E-03 | 2.17  |
| protein complex assembly                                | 8                      | 491             | 1.63       | 7.36E-03 | 2.14  |
| phosphorus metabolic process                            | 14                     | 1186            | 1.19       | 7.71E-03 | 2.12  |
| phosphate metabolic process                             | 14                     | 1186            | 1.19       | 7.71E-03 | 2.12  |
| regulation of transferase activity                      | 7                      | 398             | 1.76       | 8.09E-03 | 2.1   |
| programmed cell death                                   | 14                     | 1193            | 1.18       | 8.11E-03 | 2.1   |
| DNA duplex unwinding                                    | 2                      | 25              | 8          | 9.05E-03 | 2.05  |
| DNA geometric change                                    | 2                      | 25              | 8          | 9.05E-03 | 2.05  |
| protein kinase cascade                                  | 9                      | 622             | 1.45       | 9.56E-03 | 2.02  |
| protein export from nucleus                             | 2                      | 26              | 7.7        | 9.77E-03 | 2.02  |
| cell cycle phase                                        | 8                      | 525             | 1.53       | 1.08E-02 | 1.97  |
| intracellular protein transport                         | 9                      | 635             | 1.42       | 1.09E-02 | 1.97  |
| regulation of osteoblast differentiation                | 2                      | 28              | 7.15       | 1.13E-02 | 1.95  |
| negative regulation of growth hormone secretion         | 1                      | 2               | 50         | 1.15E-02 | 1.94  |

For each GO process, the number of genes in the data set is compared to the number of genes assigned to the GO process. The percent of genes in the data set that are also assigned to the GO process is given and used to determine the probability that the GO process is over-represented in the data set. p-value gives the probability that a process is over-represented upon miR-24 overexpression. The Score is defined as  $-\log[p\text{-value}]$ .

Suppl. Table 4. Sequence of primers used for qRT-PCR

| Gene       | Forward Primer           | Reverse Primer            |
|------------|--------------------------|---------------------------|
| GAPDH      | TGCACCACCAACTGCTTAGC     | GGCATGGACTGTGGTCATGAG     |
| SDHA       | TGGGAACAAGAGGGCATCTG     | CCACCACTGCATCAAATTCATG    |
| UBC        | ATTTGGGTCGCGGTTCTTG      | TGCCTTGACATTCTCGATGGT     |
| c-myc      | TCTTCCCCTACCCTCTCAACGA   | TTCCTCATCTTCTTGTTCCTCCTCA |
| H2AFX      | AGCAAACCTCAACTCGGCAAT    | ACTCCCCAATGCCTAAGGTT      |
| UBD        | GCTCAGTGGCACAAGTGAAA     | CTGCCATCATCTTCCCATCT      |
| CNDP2      | GGGCTTATGAGTGACCTGGA     | GTGCTTTTGGACCTTGGGTA      |
| PER2       | AAATGGATCCCCCTTGAATC     | AGCACCACCTGGTGTACCTC      |
| BCL2L12    | CGCCTCCTCTTTTCCTCTTT     | GGCTGTGTA CTCTGGGGAAA     |
| STX16      | CCAGACTTTGAGAGGCCAAG     | CCACCCGGCTAATTTTTGTA      |
| ZNF317     | GACTGGACCTCCCGTATGAA     | TCACGTGACTCTCCAAGCTG      |
| MBD6       | CCTGCCAAAAACAAGAGGAG     | AGGCTCAGCACTCAGCTCTC      |
| MCM4       | TTGAAGCCATTGATGTGGAA     | GGCACTCATCCCCGTAGTAA      |
| MCM10      | TTGTTGTGGGAGATGGTTGA     | CCTTCCACCCAATTAGAGCA      |
| RRM2       | AGCTTGGTCGACAAGGAGAA     | GGCAGCTGCTTTAGTTTTCG      |
| BRCA1      | CTGAAGATGTTCCCTTGGATAACA | TTGATTCAGACTCCCCATCAT     |
| E2F1       | TACCCCAACTCCCTCTACCC     | GTCTCCCTCCCTCACTTTCC      |
| E2F2       | GAGCTCACTCAGACCCCAAG     | AACAGGCTGAAGCCAAAAGA      |
| E2F3       | GGGTATGCGTGGGTGTATGT     | AGTGTGTGTGAGGGGAGGAG      |
| PCNA       | CGGATACCTTGGCGCTAGTA     | CACAGCTGTACTCCTGTTCTGG    |
| AURKB      | TCTGCTCTTAGGGCTCAAGG     | TGCCACACATTGTCTTCCTC      |
| CCNA2      | CACAGCATGCACAACAGTCA     | AGAAAACAAAGGCAGTCTTTCA    |
| CHEK1      | TGCAGAACCAGTTGATGTTTTG   | ACAGCTGTCACTGGGTTGGT      |
| CDC2       | TGAGTTTCTTTCCATGGATCTG   | CAATCCCCTGTAGGATTTGG      |
| FEN1       | AACCCCGAACCAAGCTTTAG     | GGGCCACATCAGCAATTAGT      |
| TOP1       | GAGATGAAAGTCCGGCAGAG     | GTGTCCGCTGTTTCTCCTTC      |
| pri-miR-24 | AGGGCTTAGCTGCTTGTGAG     | CAAGGCCAGAGGAGGTGAG       |

**Suppl. Table 5. Sequence of primers and oligonucleotides used for cloning 3'UTR and MREs for miR-24 target genes**

| <b>Forward primer</b>              | <b>Sequence of Forward Primer (5' to 3')</b>   | <b>Reverse Primer</b>              | <b>Sequence of Reverse Primer (5' to 3')</b>    |
|------------------------------------|------------------------------------------------|------------------------------------|-------------------------------------------------|
| AURKB 3'UTR FP                     | ATGACTCGAGTGGTCCCTGTCTTCACTCGGGTGGC            | AURKB 3'UTR RP                     | ATGAGCGGCCGCTCATGAGTACAAAAAGCTTCAGCC            |
| BRCA1 3'UTR FP                     | ATGACTCGAGCTGACGCCAGCCACAGGTACAGAGCCACAG       | BRCA1 3'UTR RP                     | ATGAGCGGCCGCGTGTGGTACCAAGTTTATTGCGATG           |
| CDC2 3'UTR FP                      | ATGACTCGAGATATCAACAGATAGTTGTGTTTTATTGTT        | CDC2 3'UTR RP                      | ATGAGCGGCCGCTTAAATATACATTAGAGCCTTTTAGATGG       |
| CHEK1 3'UTR FP                     | ATGACTCGAGCTGGGGAATCCTGGTGAATA                 | CHEK1 3'UTR RP                     | ATGAGCGGCCCGCCACAAGAATTATGCTTTATTGGTTCA         |
| CDK4 3'UTR FP                      | ATGACTCGAGCAATGAGAGTGGCTGCCATGGAAGGAAG         | CDK4 3'UTR RP                      | ATGAGCGGCCCGGACCAATTATTTCTTTGTTTTGTTTTCTT       |
| CCNA2 3'UTR FP                     | ATGACTCGAGCAATGAAAGACTGCCTTTGTTTTCTAAG         | CCNA2 3'UTR RP                     | ATGAGCGGCCCGCTTAAACAAATTTCTGTTTTATTCAAATGT      |
| FEN1 3'UTR FP                      | ATGACTCGAGATGTGTTTTCCCATATTACCTC               | FEN1 3'UTR RP                      | ATGAGCGGCCCGCAAAAACAGCGCATGAAAAAC               |
| E2F1 3'UTR FP                      | ATGACTCGAGCAGGGCTTGGAGGGACCAGGGTTTC            | E2F1 3'UTR RP                      | ATGAGCGGCCCGCACCTTTACTGGATCTGCTTTTGAGTTAGGACC   |
| E2F2 3'UTR FP                      | ATGACTCGAGGTGGCCCTGCCTGCCCCAGCAGCCCTG          | E2F2 3'UTR RP                      | ATGAGCGGCCCGCCCGAGAGCTGCGATTTAATGTTTAAATG       |
| E2F3 3'UTR FP                      | ATGACTCGAGTTATGCTTCGTGTGAACCTCCTC              | E2F3 3'UTR RP                      | ATGAGCGGCCCGCTTAAAAAAATCATTTTTATTGATCCTTTA      |
| MYC 3'UTR FP                       | ATGACTCGAGGAAAAAGTAAAGAAAAACGATTCCTTCT         | MYC 3'UTR RP                       | ATGAGCGGCCGCTTTGGCTCAATGATATATTTGCCAGTTA        |
| WTCCNA2 short 3'UTR fragment FP    | ATGACTCGAGGGGAAGTAAAAAGCTTCCT                  | WTCCNA2 short 3'UTR fragment RP    | ATGAGCGGCCCGCAGCGAAAAAGTCTGGGGAAT               |
|                                    | 5'-                                            |                                    | 5'-                                             |
|                                    | TGAGGGGAAGTAAAAAGCTTCCTCTAAAAATTAAGTAGGTTTA    |                                    | GGCCGCGAGCGAAAAAGTCTGGGAATCTCTACTGTATCTATCTCTG  |
|                                    | GGAAAAAGCAGCCCTCAAATTCGACATTCATTTTCTAAGCAACTG  |                                    | AATACTGTATTCAGATATGCTTAGATTAGATTATCGAGTCGAGTCGT |
|                                    | GAACAAGGACGACTCGACTCGAATAATCTAATTAAGCATATCTGAA |                                    | CCTGTCCAGTTGCTTAGGAAAAATGAATGTCAGAATTTGAGGGTCC  |
|                                    | TACAGTATTCAGAGATAGATACAGTAGAGATTTCCAGACTTTTTTC |                                    | TGTTTTCTAAACCTAGTTAATTTTATAGAGGAAGGCTTTTCACTCC  |
|                                    | GCTGC-3'                                       |                                    | CC-3'                                           |
| MT CCNA2 short 3'UTR forward oligo | TCGAGCGTGTGTTTGTATGTCTGTGTAGC                  | MT CCNA2 short 3'UTR reverse oligo | GGCCGCTACACAGACATACAAACACACGC                   |
| WTAURKB MRE1 FP                    | TCGAGGGACAGGGAAGAACTGACTCGTGC                  | WTAURKB MRE1 RP                    | GGCCGACAGAGTCAGTCTTCCCTGTCCC                    |
| MTAURKB MRE1 FP                    | TCGAGTGTTCACAAGGCGAGAGTACAGC                   | MTAURKB MRE1 RP                    | GGCCGCTGACTCTCGCTTTGTGAACAC                     |
| WTBRCA1 MRE1 FP                    | TCGAGTCTCAAAATGTTGGAGTGGAAACAGC                | WTBRCA1 MRE1 RP                    | GGCCGCTGTTCCACTCCAACATTTGAGAC                   |
| WTBRCA1 MRE2 FP                    | TCGAGGTGACAGTGAAGTGTGGCTCAGC                   | WTBRCA1 MRE2 RP                    | GGCCGCTGAGCCACAGTCTCACTGCACC                    |
| WTBRCA1 MRE3 FP                    | TCGAGCCGAAAAGGACTTCTGGCTAGC                    | WTBRCA1 MRE3 RP                    | GGCCGCTAGCCAGAAGTCTTTTCAGGCC                    |
| WTBRCA1 MRE4 FP                    | TCGAGAGGTGGAGGTTGCAGTGAGCCAGC                  | WTBRCA1 MRE4 RP                    | GGCCGCTGGCTCACTGCAACCTCCACCTC                   |
| WTBRCA1 MRE5 FP                    | TCGAGAGGTGGAGGTTGCAGCTTAGCAGC                  | WTBRCA1 MRE5 RP                    | GGCCGCTGTAAAGGTCGAACCTCCACCTC                   |
| MTBRC1 MRE1 FP                     | TCGAGCTTGGCTTTTCGAGTCTGAGTTTC                  | MTBRC1 MRE1 RP                     | GGCCGCAAACTCAGACTCGAAAGCCAAGC                   |
| WTCD2 MRE1 FP                      | TCGAGGATGGGATGGATTGACTCGGTGC                   | WTCD2 MRE1 RP                      | GGCCGCAACCGAGTCAATCCATCCCATCC                   |
| MTCD2 MRE1 FP                      | TCGAGGCTTATCTTGGCTTTCGAGTCTGC                  | WTCD2 MRE2 RP                      | GGCCGCAACTCGAAAGCCAAGATAAGCC                    |
| WTCD2 MRE2 FP                      | TCGAGCATGCCAAAATTTGCTAAGTCTGC                  | WTCD2 MRE3 RP                      | GGCCGCAAGCTAGCAAAATTTGGCATGC                    |
| WTCD2 MRE3 FP                      | TCGAGCTTGGCTTTTATCTCTGAGGCTGC                  | WTCDK4 MRE1 RP                     | GGCCGCAAGCTCAGATGATATATTTGAGGGAAGGCTTTTCACTCC   |
| WTCDK4 MRE1 FP                     | TCGAGGATAGGGATGATGACTCGGTGC                    | WTCDK4 MRE1 RP                     | GGCCGCAACCGAGTCAAGTCAATCCATCC                   |
| WTCDK4 MRE2 FP                     | TCGAGTTCCTTCTGACACTGAGAGGGC                    | WTCDK4 MRE2 RP                     | GGCCGCTTACTCAGTGTCCAGAAGGGAAC                   |
| WTCDK4 MRE3 FP                     | TCGAGCATTTCTTACACTAAGGGTAGC                    | WTCDK4 MRE3 RP                     | GGCCGCTACCCCTTAGTGTAGAGAAATGC                   |
| WTCCNA2 MRE1 FP                    | TCGAGATCAATTGCTGACTTGGGCATGC                   | WTCCNA2 MRE1 RP                    | GGCCGCTAGCCCAAGTCAAGTTCAGTTC                    |
| WTCCNA2 MRE2 FP                    | TCGAGATTTTCTAAGCAACTGGATCAGC                   | WTCCNA2 MRE2 RP                    | GGCCGCTTACTCATAGCTGACACATTTTC                   |
| WTCCNA2 MRE3 FP                    | TCGAGAAAATGTGTGACTATGAGTAAAG                   | WTCCNA2 MRE3 RP                    | GGCCGCAAACTCAGCTGATTGCCAGGTGC                   |
| WTFEN1 MRE1 FP                     | TCGAGCACCTGGCAATCAGCTGAGTTGGC                  | WTFEN1 MRE1 RP                     | GGCCGCAACCGAGTCAAGTTGCTCGTGC                    |
| MT FEN1 MRE1 FP                    | TCGAGGACCAGGCAAACTGACTCGGTGC                   | MT FEN1 MRE1 RP                    | GGCCGCAAGACAGCCAGTAAATCAGTCAC                   |
| WT FEN1 MRE2 FP                    | TCGAGTGAATGACTGAGTGTGTCTGC                     | WT FEN1 MRE2 RP                    | GGCCGCTGGCTCTCTCAAGGTGGGTCC                     |
| WT FEN1 MRE3 FP                    | TCGAGGACCCACCTTGAGAGAGGCCAGC                   | WT FEN1 MRE3 RP                    | GGCCGCTGTTTCAAGCCAGGCAAGCCACC                   |
| WTE2F2 MRE1 FP                     | TCGAGGTGGGTGCTCTGGGCTGAACCAGC                  | WTE2F2 MRE1 RP                     | GGCCGCAACTAGTCAAGTCTCCTCGTCC                    |
| MTE2F2 MRE1 FP                     | TCGAGGACGAGGAGACTTGAAGTGC                      | MTE2F2 MRE1 RP                     | GGCCGCTGGCTCTGTTCCACAGGAGCC                     |
| WTE2F2 MRE2 FP                     | TCGAGGCTCCTGTGAAAACAGGAGCCAGC                  | WTE2F2 MRE2 RP                     | GGCCGCTGATCAGTCAAGTCAAGGAGCCAC                  |
| WTE2F2 MRE3 FP                     | TCGAGTGGCTCCTGAGCTGACTGACTGGC                  | WTE2F2 MRE3 RP                     | GGCCGCTGGATCACTTGAAGTCAAGGAGTC                  |
| WTE2F2 MRE4 FP                     | TCGAGACTCCTGACCTCAAGTATCCAGC                   | WTE2F2 MRE4 RP                     | GGCCGCTGGATCACTTGAAGTCAAGGAGTC                  |
| WTE2F2 MRE5 FP                     | TCGAGCATCTCCAGCTGAGTGCCTGGC                    | WTE2F2 MRE5 RP                     | GGCCGCTGGATCACTTGAAGTCAAGGAGTC                  |
| WTMYC MRE1 FP                      | TCGAGACTGTTTCAAAATGCATGATCAGC                  | WTMYC MRE1 RP                      | GGCCGCTGAAACAAGTTCATAGGTGATTC                   |
| WTMYC MRE2 FP                      | TCGAGAAATCACTATGAACCTGTTTCAGC                  | WTMYC MRE2 RP                      | GGCCGCTGAAACAAGTTCATAGGTGATTC                   |
| WTMYC MRE3 FP                      | TCGAGTGTTCCTGTGAAAATATTGCCAGC                  | WTMYC MRE3 RP                      | GGCCGCTGAAACAAGTTCATAGGTGATTC                   |
| MTMYC MRE3 FP                      | TCGAGTGAATGCTGTACACATTTGGAGC                   | MTMYC MRE3 RP                      | GGCCGCTGAAACAAGTTCATAGGTGATTC                   |
| WTMYC MRE4 FP                      | TCGAGCCTGGCTGAGTCTTGGAGACTGGC                  | WTMYC MRE4 RP                      | GGCCGCTGAAACAAGTTCATAGGTGATTC                   |
| WTMYC MRE5 FP                      | TCGAGGCTCAAATGGACTTTGGGACAGC                   | WTMYC MRE5 RP                      | GGCCGCTGAAACAAGTTCATAGGTGATTC                   |
| WTMYC MRE6 FP                      | TCGAGCTGGCAAAATATCATTGAGCCAGC                  | WTMYC MRE6 RP                      | GGCCGCTGAAACAAGTTCATAGGTGATTC                   |
| MTMYC MRE6 FP                      | TCGAGCTGGCAAAATATCAGCAACAGGC                   | MTMYC MRE6 RP                      | GGCCGCTGAAACAAGTTCATAGGTGATTC                   |

Wild-type miR-24 MREs start with WT and mutant MREs start with MT. Details of cloning procedure are in Materials and methods.
